# Supplementary material
Source: publisher figshare collection journal article supplement (https://acs.figshare.com/ndownloader/files/25756977)
Supplement: Supplementary file 1 [file 25756977]

# **Proteomics of anatomical sections of the gut of *Nosema*-infected Western honey bee (*Apis mellifera*) reveals different early responses to *Nosema* spp. isolates**

<sup>1,2</sup>Camille Houdelet, <sup>3</sup>Chainarong Sinpoo, <sup>3</sup>Thunyarat Chantaphanwattana, <sup>2</sup>Sébastien N. Voisin, <sup>4</sup>Michel Bocquet, <sup>3,5</sup>Panuwan Chantawannakul\* and <sup>1,2</sup>Philippe Bulet\*.

<sup>1</sup>CR University Grenoble Alpes, Institute for Advanced Biosciences, Inserm U1209, CNRS UMR 5309, Grenoble, France

<sup>2</sup>Plateform BioPark Archamps, 260 Avenue Marie Curie Archparc 74166 Saint Julien-en-Genevois France

<sup>3</sup>Department of Biology, Faculty of Science, Chiang Mai University, Chiang Mai 50200, Thailand

<sup>4</sup>Michel Bocquet, Apimedia, Annecy, France

<sup>5</sup>Environmental Science Research Center (ESRC), Faculty of Science, Chiang Mai University, Thailand

## **Table of content**

|                                                                                                                      |        |
|----------------------------------------------------------------------------------------------------------------------|--------|
| <b>Figure S1.</b> Experimental procedure to infect individual bees with a <i>Nosema</i> inoculum.....                | S-2    |
| <b>Figure S2.</b> KEGG pathways of the up-regulated proteins.....                                                    | S-3-5  |
| <b>Figure S3.</b> KEGG pathways of the down-regulated proteins.....                                                  | S-6-8  |
| <b>Table S1.</b> PCR results of the identification of the four <i>Nosema</i> isolates.....                           | S-9    |
| <b>Table S2.</b> <i>Nosema</i> spores counted for each experimental modality.....                                    | S-10   |
| <b>Table S3.</b> Multireport of proteins identified in the esophagus section.....                                    | (xlsx) |
| <b>Table S4.</b> Multireport of proteins identified in the crop section of the <i>Apis mellifera</i> gut tissue..... | (xlsx) |
| <b>Table S5.</b> Multireport of proteins identified in the midgut section.....                                       | (xlsx) |
| <b>Table S6.</b> Multireport of proteins identified in the ileum section.....                                        | (xlsx) |
| <b>Table S7.</b> Multireport of proteins identified in the rectum section.....                                       | (xlsx) |
| <b>Table S8.</b> Comparison of the proteins identified between our experiments and previous published data.....      | (xlsx) |

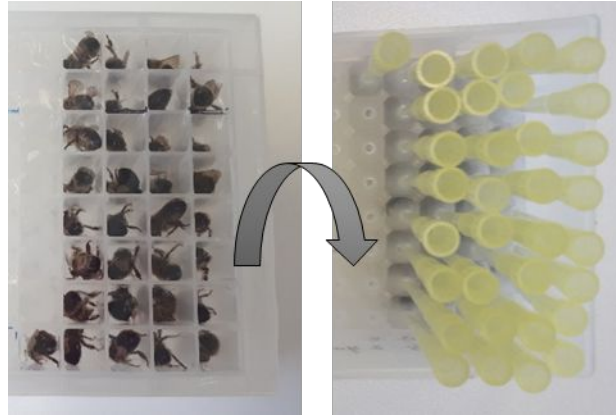

**Figure S1: Experimental procedure to infect individual bees with a *Nosema* inoculum**

To infect a large number of bees individually with a *Nosema* inoculum, we have developed the following method. After 15 hours of fasting each bee was placed individually in a home-made “inoculated-96-well deep bottom plate”. It consists of a 96-well deep bottom plate with holes at the bottom. After placing the bees in the holes, the box is covered with a plastic film. The box is turned over, then 10-200  $\mu\text{L}$  pipette tips containing the syrup are placed in front of each bee. Bees were either fed with 10  $\mu\text{L}$  of 50% syrup containing 100,000 spores for the experimental bees, or fed with syrup alone for the control bees. The bees were kept in this device the time to consume all of the syrup. They were then removed from the device and then placed by experimental group in boxes with syrup *ad libitum* until tissues collection.

S2A: Mapping of the pathway ECM-receptor interaction (KEGG Pathways number ame04512). In a presence of *Nosema* spores the two Collagen IV NC1 domain-containing proteins of *A. mellifera* up-regulated are involved in the protein processing in endoplasmic reticulum pathway (in green circles).

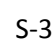

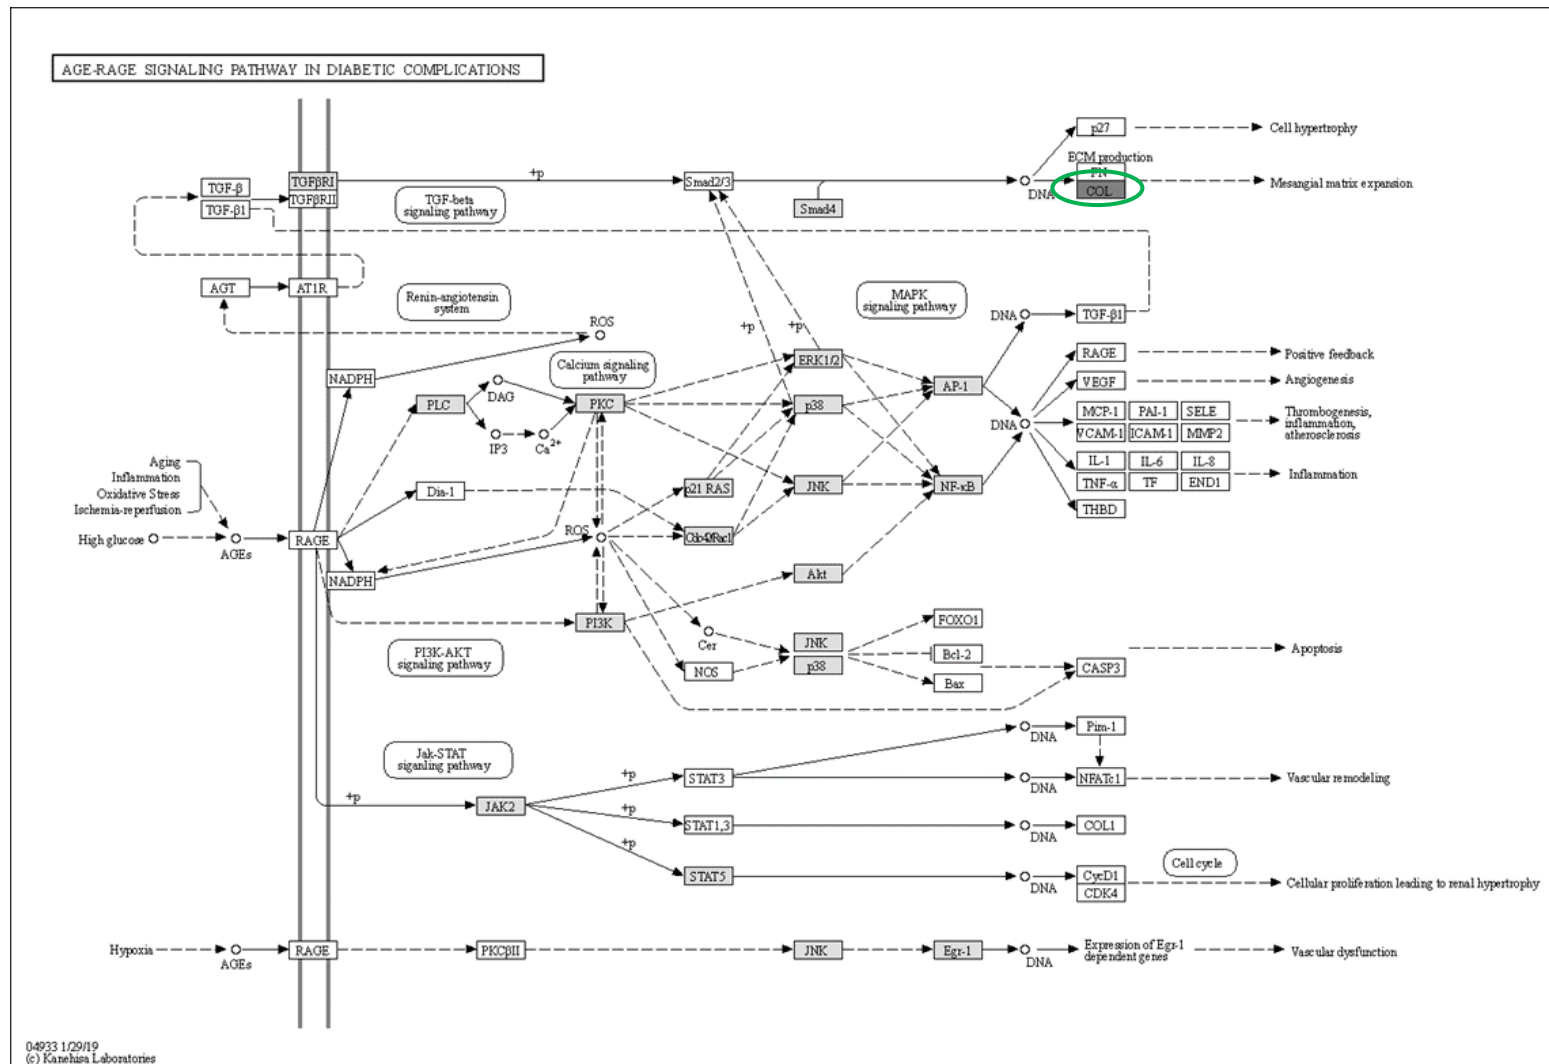

S2B: Mapping of the pathway AGE-RAGE signaling pathway in diabetic complications (KEGG Pathways number ame04933). In a presence of *Nosema* spores the two Collagen IV NC1 domain-containing proteins of *A. mellifera* up-regulated are involved in the protein processing in endoplasmic reticulum pathway (in green).

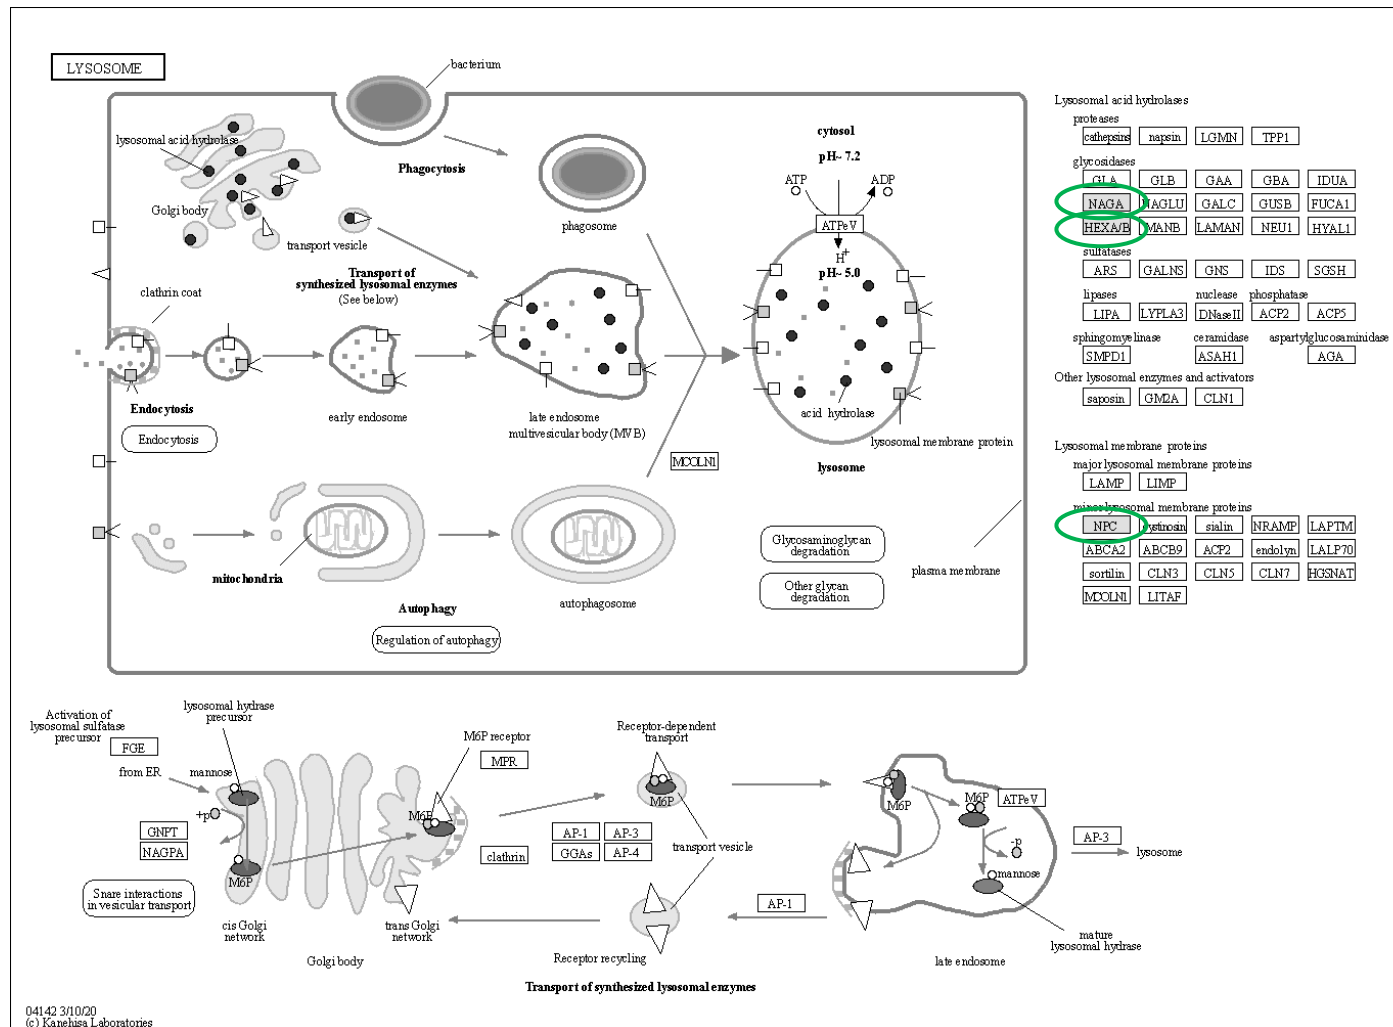

S2C: Mapping of the lysosome pathway (KEGG Pathways number ame04933). In a presence of *Nosema* spores the three proteins (Alpha-galactosidase, Beta-hexosaminidase and ML domain-containing protein) of *A. mellifera* up-regulated are involved in the protein processing in endoplasmic reticulum pathway (in green circles).

[illegible]

S-6

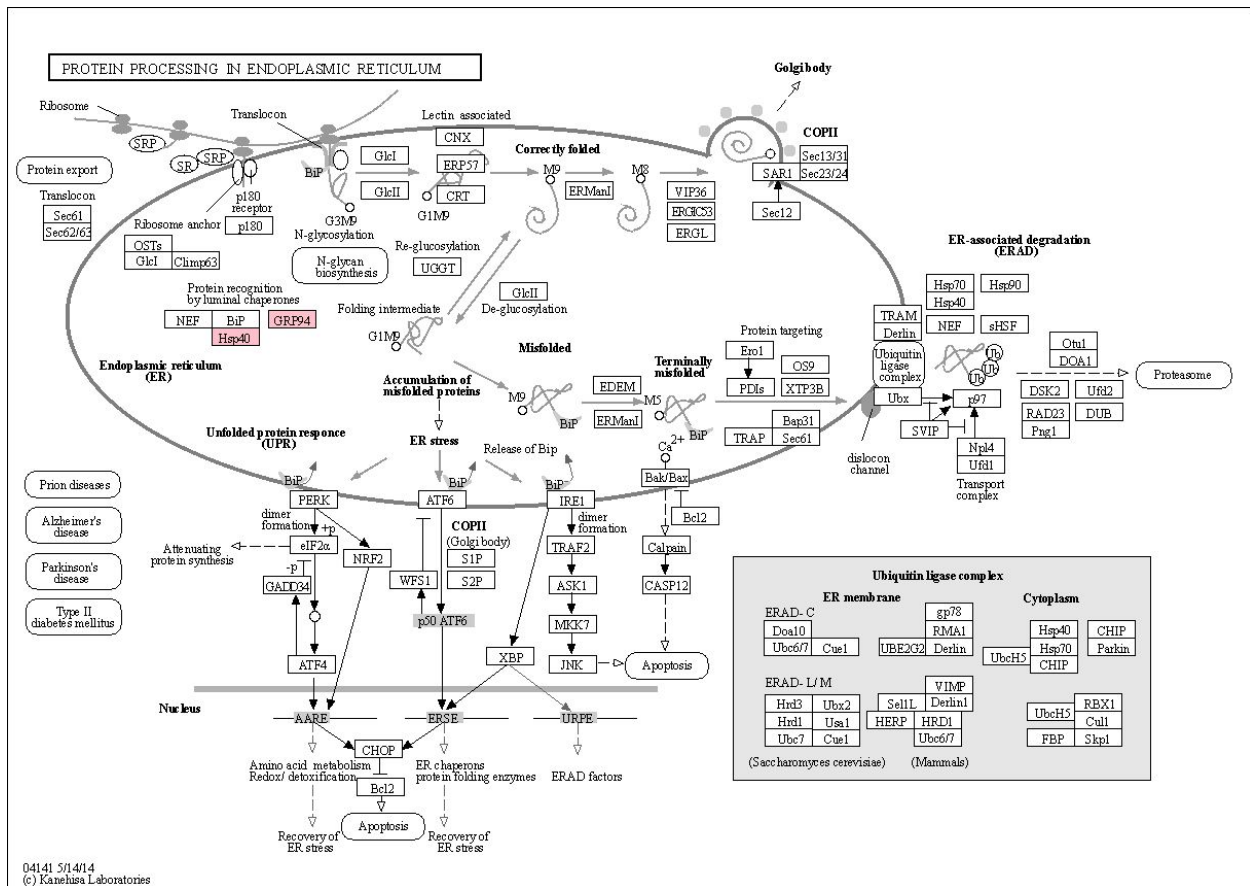

S3B: Mapping of the pathway protein processing in endoplasmic reticulum (KEGG Pathways number ame04141). In a presence of *Nosema* spores the two proteins (HATPase\_c domain-containing protein and Uncharacterized protein with the accession number A0A088ABL3) of *A. mellifera* down-regulated are involved in the protein processing in endoplasmic reticulum pathway (in red).

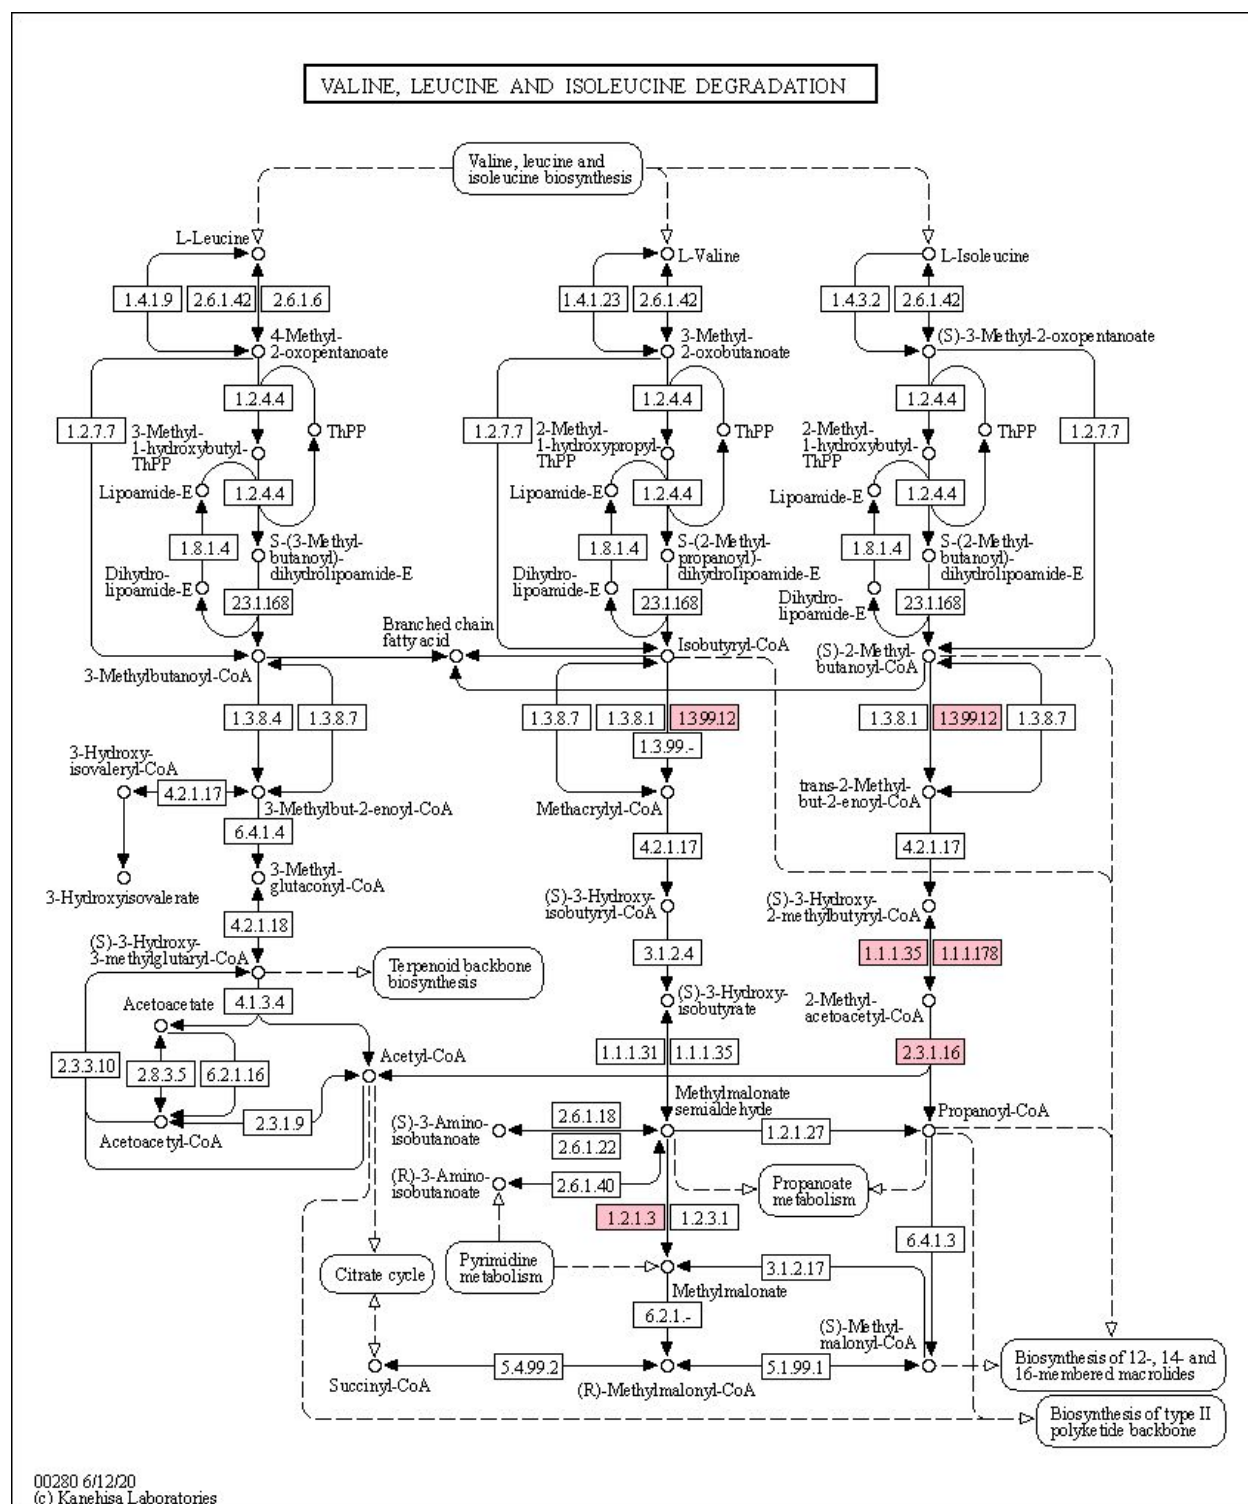

S3C: Mapping of the pathway valine, leucine and isoleucine degradation (KEGG Pathways number 00280). In a presence of *Nosema* spores the four proteins (short/branched chain specific acyl-CoA dehydrogenase, aldehyde dehydrogenase, trifunctional enzyme subunit beta, 3-hydroxyacyl-CoA dehydrogenase type-2) of *A. mellifera* down-regulated are involved in the oxidative phosphorylation pathway (in red).

**Table S1: PCR results of the four *Nosema* isolates.**

*Nosema* species were confirmed by PCR analysis. The presence of *Nosema* was scored as 1 and 0 for its absence.

| <i>Apis mellifera</i>                                          |        |                   |                |
|----------------------------------------------------------------|--------|-------------------|----------------|
| Condition of <i>Nosema</i> infection                           | Apiary | PCR confirmation  |                |
|                                                                |        | <i>N. ceranae</i> | <i>N. apis</i> |
| <i>N. ceranae</i> from <i>A. cerana</i> from Thailand (NC1)    | 1      | 1                 | 0              |
|                                                                | 2      | 1                 | 0              |
|                                                                | 3      | 1                 | 0              |
| <i>N. ceranae</i> from <i>A. mellifera</i> from Thailand (NC2) | 1      | 1                 | 0              |
|                                                                | 2      | 1                 | 0              |
|                                                                | 3      | 1                 | 0              |
| <i>N. ceranae</i> from <i>A. mellifera</i> from France (NF)    | 1      | 1                 | 0              |
|                                                                | 2      | 1                 | 0              |
|                                                                | 3      | 1                 | 0              |
| <i>N. apis</i> (NA)                                            | 1      | 0                 | 1              |
|                                                                | 2      | 0                 | 1              |
|                                                                | 3      | 0                 | 1              |

**Table S2: *Nosema* spores counted for each experimental modality.**

| <i>Apis mellifera</i>                                                  |        |            |               |              |              |
|------------------------------------------------------------------------|--------|------------|---------------|--------------|--------------|
| <i>Nosema</i> spp.                                                     | Apiary |            |               |              |              |
|                                                                        |        | Result     | MEAN          | SD           | SE           |
| <i>N.ceranae</i> from<br><i>A. cerana</i> from<br>Thailand<br>(NC1)    | 1      | 27,600,000 | 25,366,666.67 | 4,488,132.50 | 2,591,224.50 |
|                                                                        |        | 28,300,000 |               |              |              |
|                                                                        |        | 20,200,000 |               |              |              |
|                                                                        | 2      | 22,900,000 | 24,433,333.33 | 1,418,919.77 | 819,213.71   |
|                                                                        |        | 25,700,000 |               |              |              |
|                                                                        |        | 24,700,000 |               |              |              |
|                                                                        | 3      | 22,700,000 | 23,266,666.67 | 1,530,795.00 | 883,804.90   |
|                                                                        |        | 22,100,000 |               |              |              |
|                                                                        |        | 25,000,000 |               |              |              |
| <i>N.ceranae</i> from<br><i>A. mellifera</i><br>from Thailand<br>(NC2) | 1      | 51,700,000 | 43,733,333.33 | 8,103,291.51 | 4,678,437.53 |
|                                                                        |        | 44,000,000 |               |              |              |
|                                                                        |        | 35,500,000 |               |              |              |
|                                                                        | 2      | 41,100,000 | 44,700,000.00 | 4,467,661.58 | 2,579,405.61 |
|                                                                        |        | 43,300,000 |               |              |              |
|                                                                        |        | 49,700,000 |               |              |              |
|                                                                        | 3      | 46,900,000 | 49,000,000.00 | 2,206,807.64 | 1,274,100.99 |
|                                                                        |        | 48,800,000 |               |              |              |
|                                                                        |        | 51,300,000 |               |              |              |
| <i>N. ceranae</i> from<br><i>A. mellifera</i><br>from France<br>(NF)   | 1      | 26,000,000 | 25,066,666.67 | 901,849.950  | 520,683.311  |
|                                                                        |        | 24,200,000 |               |              |              |
|                                                                        |        | 25,000,000 |               |              |              |
|                                                                        | 2      | 26,300,000 | 25,766,666.67 | 1,955,334.58 | 1,128,912.94 |
|                                                                        |        | 27,400,000 |               |              |              |
|                                                                        |        | 23,600,000 |               |              |              |
|                                                                        | 3      | 26,700,000 | 25,166,666.67 | 2,318,045.15 | 1,338,323.99 |
|                                                                        |        | 26,300,000 |               |              |              |
|                                                                        |        | 22,500,000 |               |              |              |
| <i>N. apis</i> (NA)                                                    | 1      | 26,000,000 | 20,366,666.7  | 4,880,915.21 | 2,817,997.71 |
|                                                                        |        | 17,700,000 |               |              |              |
|                                                                        |        | 17,400,000 |               |              |              |
|                                                                        | 2      | 16,100,000 | 17,466,666.7  | 1,266,227.99 | 731,057.073  |
|                                                                        |        | 17,700,000 |               |              |              |
|                                                                        |        | 18,600,000 |               |              |              |
|                                                                        | 3      | 13,400,000 | 15,500,000.00 | 1,835,755.97 | 1,059,874.20 |
|                                                                        |        | 16,800,000 |               |              |              |
|                                                                        |        | 16,300,000 |               |              |              |
